# Supplementary material
Source: publisher figshare collection journal article supplement (https://acs.figshare.com/ndownloader/files/4032295)
Supplement: Supplementary file 1 [file 4032295]

## Supporting information

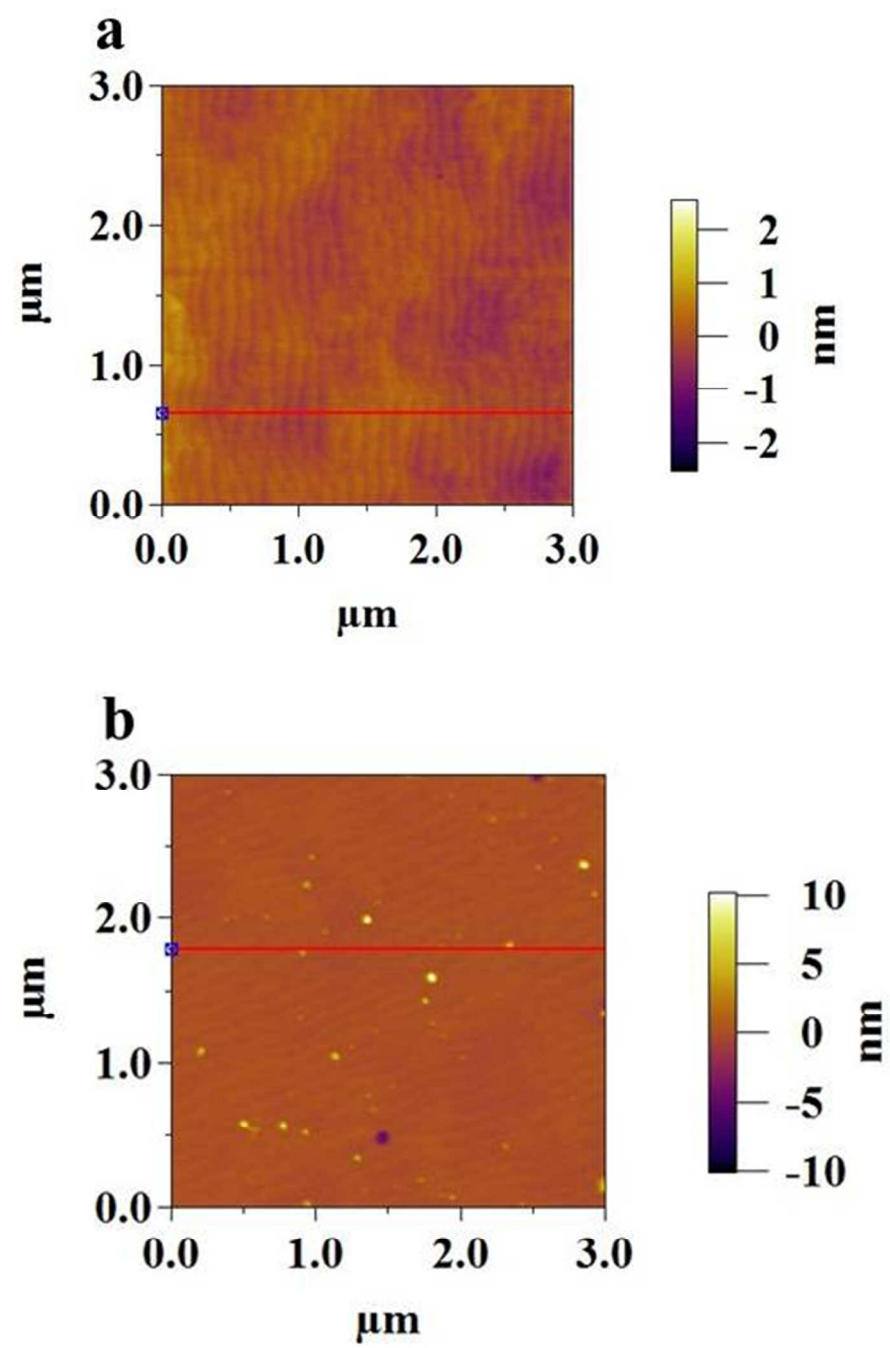

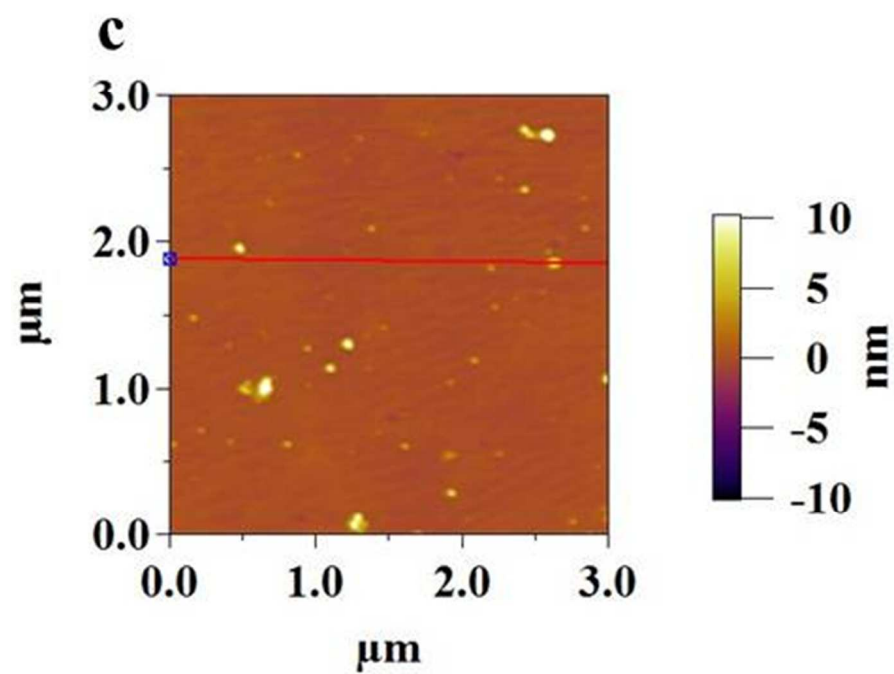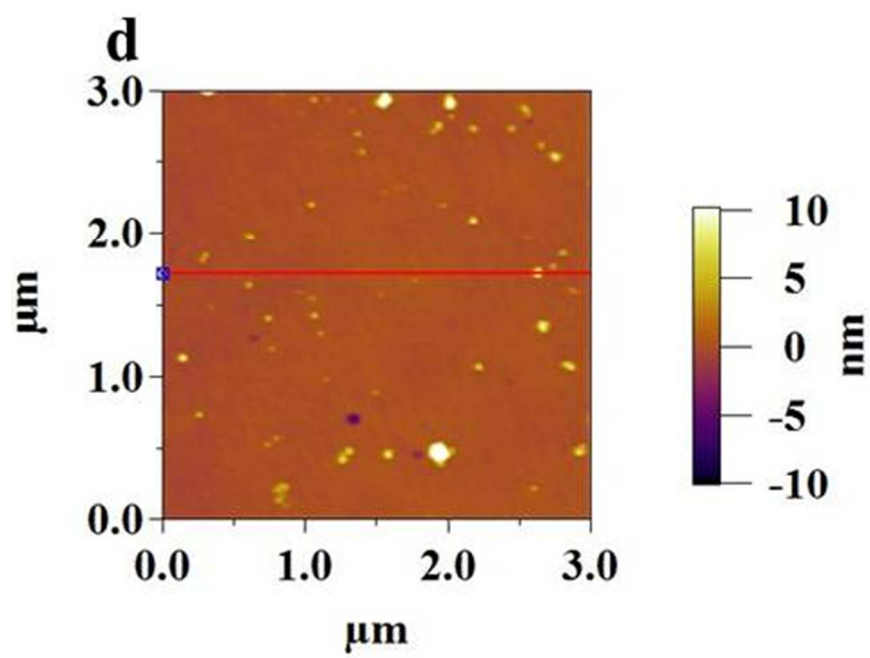

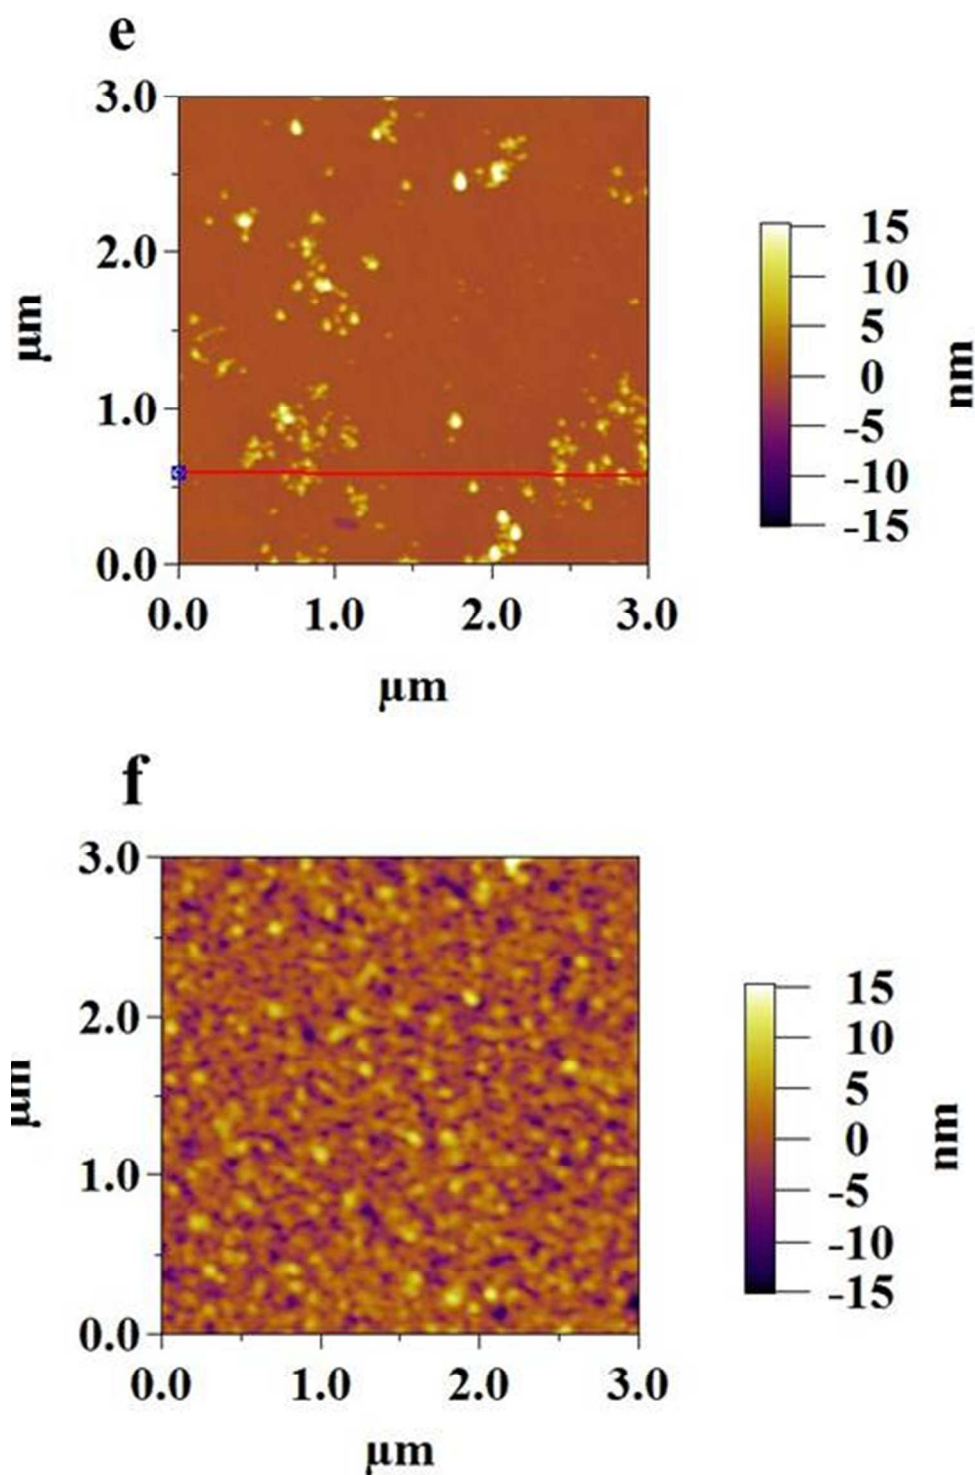

**Figure S1.** Height AFM images of ZnO (0001) in case of using different amounts of MK-2: (a) clean surface, (b) 0.005 mM, (c) 0.01 mM, (d) 0.02 mM, (e) 0.5 mM, (f) 5 mM. Red lines are cross sections in Figure S2; deposition was reached by dipping ZnO (0001) electrode into MK-2 aqueous solution for 5 hours. Red lines are cross sections shown in Figure 4.

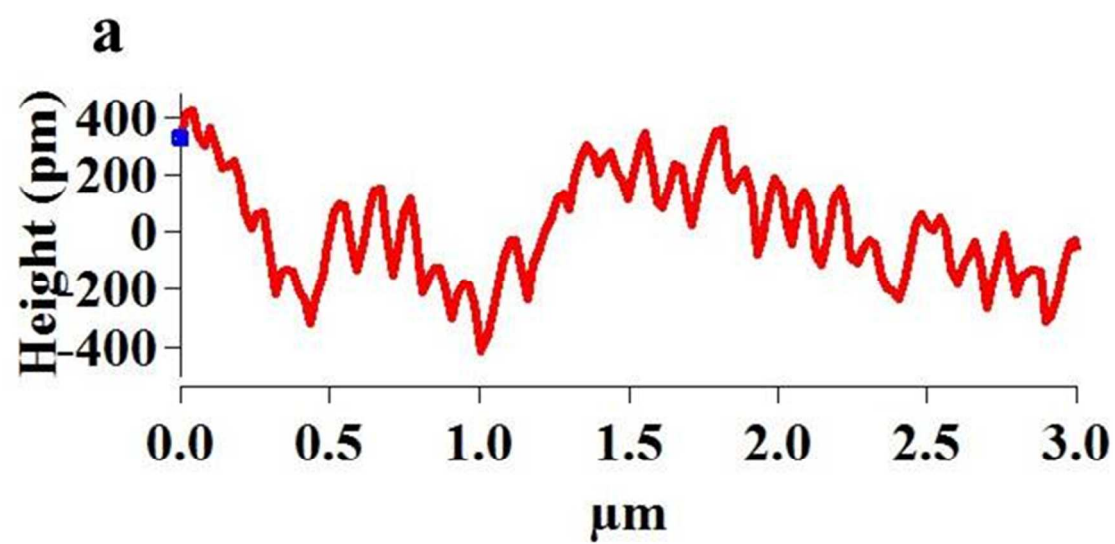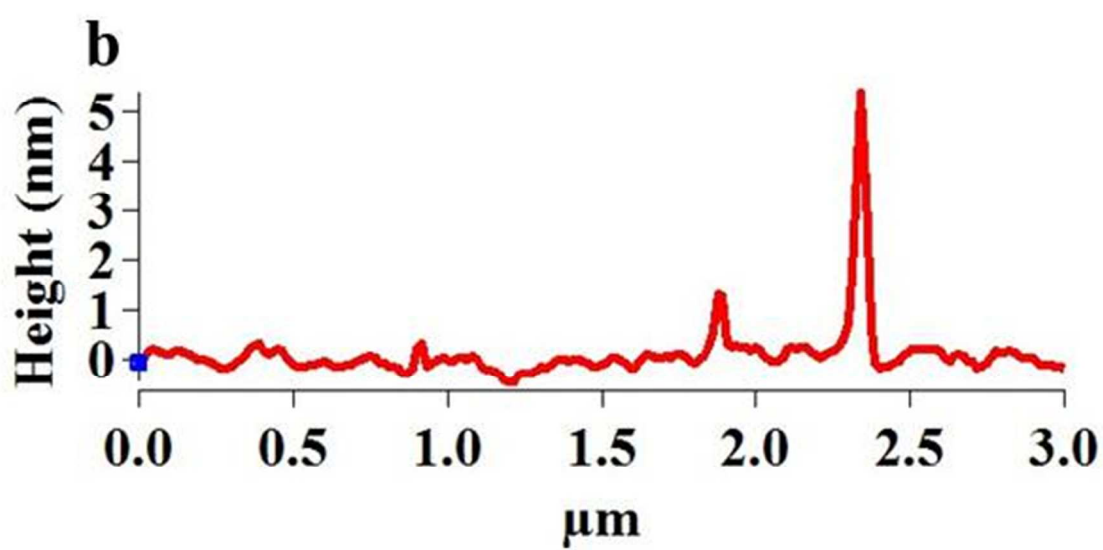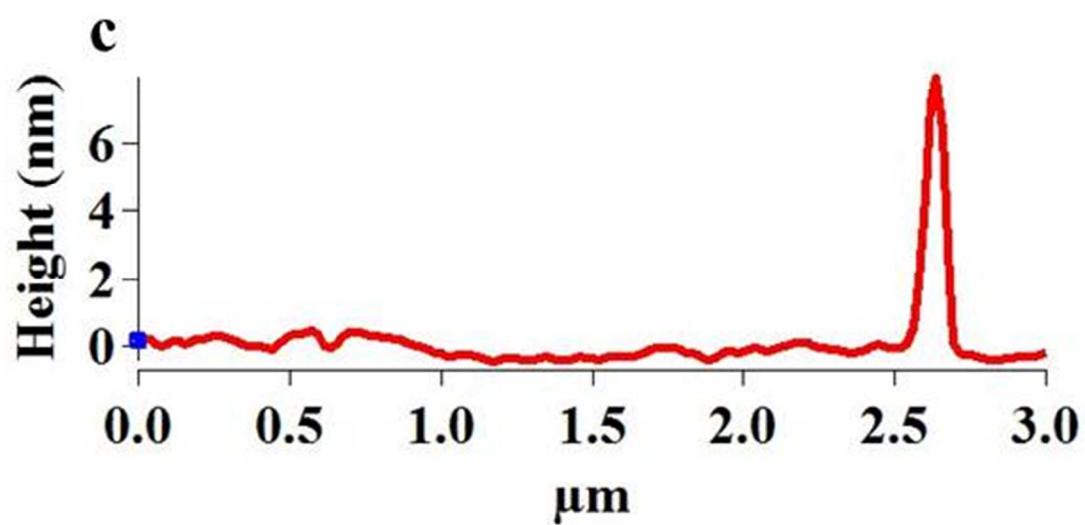

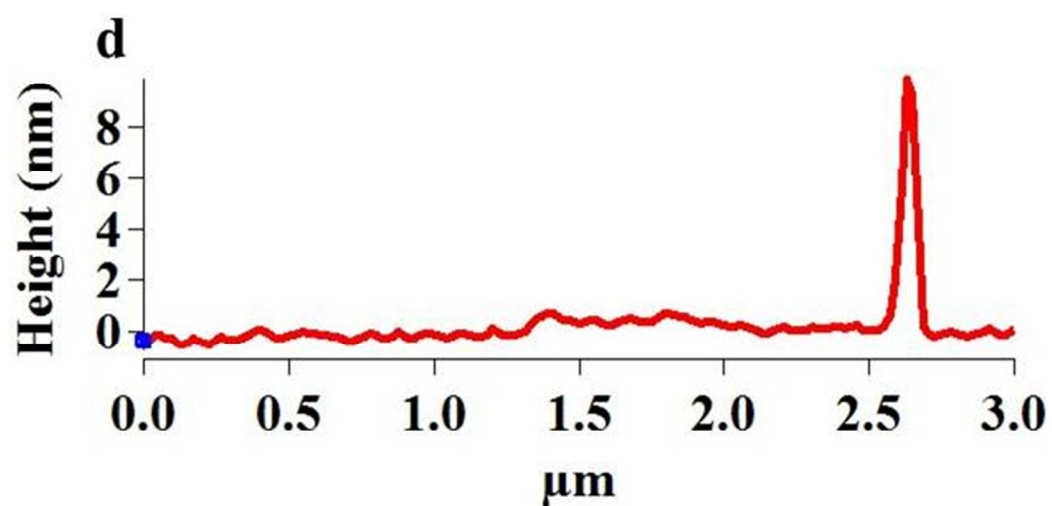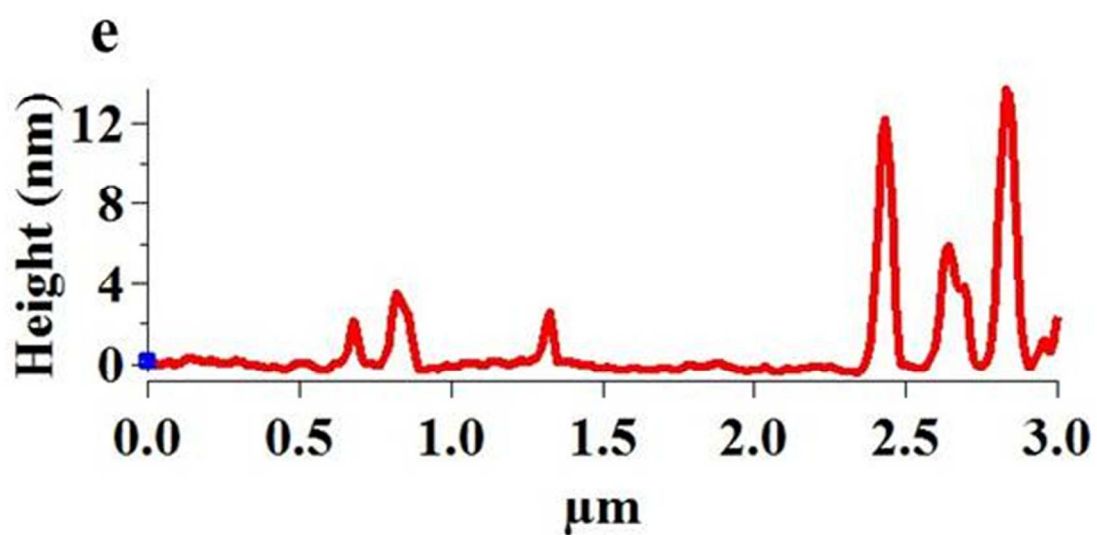

**Figure S2.** Cross section results for the images 1a-(a), 1b-(b), 1(c)-(c), 1(d)-(d), 1(e)-(e) Cross sections are shown as the red lines in Figure 1.
